# Supplementary material for: Hereditary cancer genes are highly susceptible to splicing mutations
Source: PLoS Genet. 2018 Mar 5;14(3):e1007231. doi: 10.1371/journal.pgen.1007231 (PMC5854443; doi:10.1371/journal.pgen.1007231)
Supplement: S7 Table — (XLS) [file pgen.1007231.s014.xls]

## Sheet: 499genes_PTVintolerance_individ
Gene	PTV-intolerant?	Individual GO terms
ABCE1	yes	CellularComponentOrganization,CellularComponentOrganizationOrBiogenesis,CellularProcess,Localization,MetabolicProcess,NuclearTransport,PrimaryMetabolicProcess,ProteinMetabolicProcess,Transport
ABCF1	no	Unclassified
ABCF3	no	Unclassified
ABI3BP	no	Unclassified
ABLIM3	no	CellularProcess
ACACA	yes	MetabolicProcess,PrimaryMetabolicProcess
ACE2	yes	Unclassified
ACSL5	no	Localization,MetabolicProcess,PrimaryMetabolicProcess,Transport
ACTL6A	yes	CellCyle,CellularComponentOrganization,CellularComponentOrganizationOrBiogenesis,CellularProcess,IntracellularProteinTransport,Localization,ProteinTransport,Transport,Vesicle-MediatedTransport
ADAM23	yes	ApoptoticProcess,ApoptoticProcess
ADAMTS6	yes	CellularProcess,MetabolicProcess,PrimaryMetabolicProcess,ProteinMetabolicProcess
AGTPBP1	no	CellularProcess,MetabolicProcess,PrimaryMetabolicProcess,ProteinMetabolicProcess
AHCYL1	yes	CellularProcess,MetabolicProcess,NitrogrenCompoundMetabolicProcess,Nucleobase-ContainingCompountMetabolicProcess,PrimaryMetabolicProcess
AHCYL2	yes	CellularProcess,MetabolicProcess,NitrogrenCompoundMetabolicProcess,Nucleobase-ContainingCompountMetabolicProcess,PrimaryMetabolicProcess
ALCAM	yes	CellularProcess
ALG9	no	Unclassified
ALS2CR8	no	Unclassified
ANAPC1	no	CellCyle,CellularProcess,MetabolicProcess,PrimaryMetabolicProcess,ProteinMetabolicProcess
ANAPC4	no	CellCyle,CellularProcess,Mitosis
ANKIB1	yes	CatabolicProcess,CellularProcess,MetabolicProcess,PrimaryMetabolicProcess,ProteinMetabolicProcess
ANKRD17	yes	Unclassified
ANKRD44	no	Unclassified
ANXA6	no	MetabolicProcess,PrimaryMetabolicProcess
AP1G1	yes	IntracellularProteinTransport,Localization,ProteinTransport,Transport,Vesicle-MediatedTransport
API5	yes	Unclassified
AQR	yes	CellCyle,CellularProcess,MetabolicProcess,Nucleobase-ContainingCompountMetabolicProcess,PrimaryMetabolicProcess,ProteinMetabolicProcess
ARFGEF1	yes	CatabolicProcess,CellularProcess,Localization,MetabolicProcess,NitrogrenCompoundMetabolicProcess,Nucleobase-ContainingCompountMetabolicProcess,Phosphate-ContainingCompoundMetabolicProcess,PrimaryMetabolicProcess,Transport,Vesicle-MediatedTransport
ARHGAP12	no	CellularProcess,IntracellularSignalTransduction
ARHGAP26	yes	CellularProcess
ARHGEF12	yes	Unclassified
ARID4A	yes	CellularProcess,MetabolicProcess,NitrogrenCompoundMetabolicProcess,Nucleobase-ContainingCompountMetabolicProcess,PrimaryMetabolicProcess
ARIH1	yes	CatabolicProcess,CellularProcess,MetabolicProcess,PrimaryMetabolicProcess,ProteinMetabolicProcess
ARMC8	yes	Unclassified
ARNT	yes	MetabolicProcess,Nucleobase-ContainingCompountMetabolicProcess,PrimaryMetabolicProcess
ARR3	no	CellularProcess,IntracellularProteinTransport,Localization,ProteinTransport,Transport,Vesicle-MediatedTransport
ATAD2	yes	CatabolicProcess,CellularProcess,MetabolicProcess,NitrogrenCompoundMetabolicProcess,Nucleobase-ContainingCompountMetabolicProcess,Phosphate-ContainingCompoundMetabolicProcess,PrimaryMetabolicProcess
ATAD2B	yes	CatabolicProcess,CellularProcess,MetabolicProcess,NitrogrenCompoundMetabolicProcess,Nucleobase-ContainingCompountMetabolicProcess,Phosphate-ContainingCompoundMetabolicProcess,PrimaryMetabolicProcess
ATF2	no	CellularProcess,IntracellularSignalTransduction,MetabolicProcess,Nucleobase-ContainingCompountMetabolicProcess,PrimaryMetabolicProcess
ATG2B	no	CatabolicProcess,CellularComponentOrganization,CellularComponentOrganizationOrBiogenesis,CellularProcess,MetabolicProcess
ATP11B	yes	CatabolicProcess,CellularComponentOrganization,CellularComponentOrganizationOrBiogenesis,CellularProcess,Localization,MetabolicProcess,NitrogrenCompoundMetabolicProcess,Nucleobase-ContainingCompountMetabolicProcess,Phosphate-ContainingCompoundMetabolicProcess,PrimaryMetabolicProcess,Transport
ATP13A3	yes	CatabolicProcess,CellularProcess,MetabolicProcess,NitrogrenCompoundMetabolicProcess,Nucleobase-ContainingCompountMetabolicProcess,Phosphate-ContainingCompoundMetabolicProcess,PrimaryMetabolicProcess
ATP2B1	yes	CatabolicProcess,CellularProcess,MetabolicProcess,NitrogrenCompoundMetabolicProcess,Nucleobase-ContainingCompountMetabolicProcess,Phosphate-ContainingCompoundMetabolicProcess,PrimaryMetabolicProcess
ATP6V1A	yes	MetabolicProcess,Nucleobase-ContainingCompountMetabolicProcess,PrimaryMetabolicProcess
ATP8A1	yes	CatabolicProcess,CellularComponentOrganization,CellularComponentOrganizationOrBiogenesis,CellularProcess,Localization,MetabolicProcess,NitrogrenCompoundMetabolicProcess,Nucleobase-ContainingCompountMetabolicProcess,Phosphate-ContainingCompoundMetabolicProcess,PrimaryMetabolicProcess,Transport,Vesicle-MediatedTransport
ATP8B4	no	CatabolicProcess,CellularComponentOrganization,CellularComponentOrganizationOrBiogenesis,CellularProcess,Localization,MetabolicProcess,NitrogrenCompoundMetabolicProcess,Nucleobase-ContainingCompountMetabolicProcess,Phosphate-ContainingCompoundMetabolicProcess,PrimaryMetabolicProcess,Transport
ATRNL1	yes	CellularProcess
BAI3	yes	CellularProcess,IntracellularProteinTransport,Localization,ProteinTransport,Transport,Vesicle-MediatedTransport
BIRC6	yes	CellularProcess,MetabolicProcess,PrimaryMetabolicProcess,ProteinMetabolicProcess
BMP2K	no	CellularComponentOrganization,CellularComponentOrganizationOrBiogenesis,CellularProcess,Localization,MetabolicProcess,Phosphate-ContainingCompoundMetabolicProcess,Transport,Vesicle-MediatedTransport
BTAF1	yes	Unclassified
BTRC	no	Unclassified
C10orf137	no	Unclassified
C10orf76	no	Unclassified
C12orf50	no	Unclassified
C1orf112	no	Unclassified
CACHD1	no	Unclassified
CACNA2D3	yes	Unclassified
CAND1	yes	CellularComponentOrganization,CellularComponentOrganizationOrBiogenesis,CellularProcess,MetabolicProcess,PrimaryMetabolicProcess,ProteinMetabolicProcess
CANX	no	IntracellularProteinTransport,Localization,MetabolicProcess,PrimaryMetabolicProcess,ProteinMetabolicProcess,ProteinTransport,Transport,Vesicle-MediatedTransport
CAPRIN1	yes	Unclassified
CAPRIN2	no	Unclassified
CCAR1	yes	Unclassified
CCDC132	yes	Unclassified
CD109	no	Unclassified
CDC14A	no	CellCyle,CellularComponentOrganization,CellularComponentOrganizationOrBiogenesis,CellularProcess,MetabolicProcess,Mitosis,Phosphate-ContainingCompoundMetabolicProcess,PrimaryMetabolicProcess,ProteinMetabolicProcess
CDC23	yes	CellCyle,CellularProcess,Mitosis
CDC27	no	CellCyle,CellularProcess,Mitosis
CDC40	yes	Unclassified
CDC42BPA	yes	CellCyle,CellularProcess,IntracellularSignalTransduction
CDC7	no	CellularComponentOrganization,CellularComponentOrganizationOrBiogenesis,CellularProcess,Localization,MetabolicProcess,NitrogrenCompoundMetabolicProcess,Nucleobase-ContainingCompountMetabolicProcess,Phosphate-ContainingCompoundMetabolicProcess,PrimaryMetabolicProcess,Transport,Vesicle-MediatedTransport
CEP350	yes	Unclassified
CEP78	no	Unclassified
CHD1	yes	Unclassified
CHD9	yes	Unclassified
CHEK1	no	CellularProcess,IntracellularSignalTransduction,MetabolicProcess,Phosphate-ContainingCompoundMetabolicProcess
CHL1	no	CellCyle,CellularProcess,MetabolicProcess,Mitosis,Nucleobase-ContainingCompountMetabolicProcess,PrimaryMetabolicProcess
CKAP5	yes	CellCyle,CellularComponentOrganization,CellularComponentOrganizationOrBiogenesis,CellularProcess
CLASP2	yes	CellCyle,CellularProcess,Mitosis
CLPX	no	CatabolicProcess,CellularProcess,MetabolicProcess,NitrogrenCompoundMetabolicProcess,Nucleobase-ContainingCompountMetabolicProcess,Phosphate-ContainingCompoundMetabolicProcess,PrimaryMetabolicProcess,ProteinMetabolicProcess
CNKSR2	yes	Unclassified
CNOT1	yes	CatabolicProcess,CellularProcess,MetabolicProcess,NitrogrenCompoundMetabolicProcess,Nucleobase-ContainingCompountMetabolicProcess,PrimaryMetabolicProcess
COG3	yes	CellularComponentOrganization,CellularComponentOrganizationOrBiogenesis,CellularProcess,Localization,ProteinLocalization,ProteinTransport,Transport,Vesicle-MediatedTransport
COL13A1	no	Unclassified
COL16A1	no	CellularComponentOrganization,CellularComponentOrganizationOrBiogenesis,CellularProcess
COL21A1	no	Unclassified
COL22A1	no	CellularComponentOrganization,CellularComponentOrganizationOrBiogenesis,CellularProcess
COL24A1	no	Unclassified
COPB1	yes	IntracellularProteinTransport,Localization,ProteinTransport,Transport,Vesicle-MediatedTransport
COPB2	yes	CellularProcess,IntracellularProteinTransport,Localization,ProteinLocalization,ProteinTransport,Transport,Vesicle-MediatedTransport
CPD	no	CellularProcess,MetabolicProcess,NitrogrenCompoundMetabolicProcess,PrimaryMetabolicProcess,ProteinMetabolicProcess
CPNE5	no	IntracellularProteinTransport,Localization,ProteinTransport,Transport
CSDE1	yes	Unclassified
CSMD3	yes	CellularProcess
CSTF3	yes	CellularProcess,MetabolicProcess,NitrogrenCompoundMetabolicProcess,Nucleobase-ContainingCompountMetabolicProcess,PrimaryMetabolicProcess
CTAGE5	no	CellCyle,CellularProcess
CUL2	yes	CatabolicProcess,CellularProcess,MetabolicProcess,PrimaryMetabolicProcess,ProteinMetabolicProcess
CXorf57	no	Unclassified
DAAM1	yes	CellularProcess
DCBLD2	no	Unclassified
DDX1	yes	CatabolicProcess,CellularProcess,MetabolicProcess,NitrogrenCompoundMetabolicProcess,Nucleobase-ContainingCompountMetabolicProcess,Phosphate-ContainingCompoundMetabolicProcess,PrimaryMetabolicProcess
DDX10	no	CatabolicProcess,CellularProcess,MetabolicProcess,NitrogrenCompoundMetabolicProcess,Nucleobase-ContainingCompountMetabolicProcess,Phosphate-ContainingCompoundMetabolicProcess,PrimaryMetabolicProcess
DDX18	no	CatabolicProcess,CellularProcess,MetabolicProcess,NitrogrenCompoundMetabolicProcess,Nucleobase-ContainingCompountMetabolicProcess,Phosphate-ContainingCompoundMetabolicProcess,PrimaryMetabolicProcess
DDX4	yes	CatabolicProcess,CellularProcess,MetabolicProcess,NitrogrenCompoundMetabolicProcess,Nucleobase-ContainingCompountMetabolicProcess,Phosphate-ContainingCompoundMetabolicProcess,PrimaryMetabolicProcess,ProteinMetabolicProcess
DDX52	no	CatabolicProcess,CellularProcess,MetabolicProcess,NitrogrenCompoundMetabolicProcess,Nucleobase-ContainingCompountMetabolicProcess,Phosphate-ContainingCompoundMetabolicProcess,PrimaryMetabolicProcess
DDX60	no	Unclassified
DENND4A	no	MetabolicProcess,Nucleobase-ContainingCompountMetabolicProcess,PrimaryMetabolicProcess
DGKH	no	CellularProcess,IntracellularSignalTransduction,MetabolicProcess,PrimaryMetabolicProcess
DGKI	no	CellularProcess,IntracellularSignalTransduction,MetabolicProcess,PrimaryMetabolicProcess
DHX15	yes	CatabolicProcess,CellularProcess,MetabolicProcess,NitrogrenCompoundMetabolicProcess,Nucleobase-ContainingCompountMetabolicProcess,Phosphate-ContainingCompoundMetabolicProcess,PrimaryMetabolicProcess
DHX29	no	CatabolicProcess,CellularProcess,MetabolicProcess,NitrogrenCompoundMetabolicProcess,Nucleobase-ContainingCompountMetabolicProcess,Phosphate-ContainingCompoundMetabolicProcess,PrimaryMetabolicProcess
DHX36	yes	CatabolicProcess,CellularProcess,MetabolicProcess,NitrogrenCompoundMetabolicProcess,Nucleobase-ContainingCompountMetabolicProcess,Phosphate-ContainingCompoundMetabolicProcess,PrimaryMetabolicProcess
DHX9	yes	CatabolicProcess,CellularProcess,MetabolicProcess,NitrogrenCompoundMetabolicProcess,Nucleobase-ContainingCompountMetabolicProcess,Phosphate-ContainingCompoundMetabolicProcess,PrimaryMetabolicProcess
DIS3	no	CatabolicProcess,CellularComponentOrganizationOrBiogenesis,CellularProcess,MetabolicProcess,NitrogrenCompoundMetabolicProcess,Nucleobase-ContainingCompountMetabolicProcess,PrimaryMetabolicProcess
DLG2	no	CellularComponentOrganization,CellularComponentOrganizationOrBiogenesis,CellularProcess,Localization,MetabolicProcess,NitrogrenCompoundMetabolicProcess,Nucleobase-ContainingCompountMetabolicProcess,Phosphate-ContainingCompoundMetabolicProcess,PrimaryMetabolicProcess,ProteinLocalization
DMTF1	yes	CellularProcess,MetabolicProcess,NitrogrenCompoundMetabolicProcess
DMXL1	yes	IntracellularProteinTransport,Localization,ProteinTransport,Transport,Vesicle-MediatedTransport
DMXL2	yes	IntracellularProteinTransport,Localization,ProteinTransport,Transport,Vesicle-MediatedTransport
DNAH14	no	CellCyle,CellularProcess,IntracellularProteinTransport,Localization,ProteinTransport,Transport,Vesicle-MediatedTransport
DNAH6	no	CellCyle,CellularProcess,IntracellularProteinTransport,Localization,ProteinTransport,Transport,Vesicle-MediatedTransport
DNAH7	no	CellCyle,CellularComponentOrganization,CellularComponentOrganizationOrBiogenesis,CellularProcess,IntracellularProteinTransport,Localization,Mitosis,ProteinTransport,Transport,Vesicle-MediatedTransport
DNAH8	no	CellCyle,CellularProcess,IntracellularProteinTransport,Localization,ProteinTransport,Transport,Vesicle-MediatedTransport
DNAJC10	no	Unclassified
DOCK10	no	CellularProcess,IntracellularProteinTransport,IntracellularSignalTransduction,Localization,ProteinTransport,Transport,Vesicle-MediatedTransport
DOCK11	yes	CellularProcess,IntracellularProteinTransport,IntracellularSignalTransduction,Localization,ProteinTransport,Transport,Vesicle-MediatedTransport
DOCK3	yes	CellularProcess,IntracellularProteinTransport,IntracellularSignalTransduction,Localization,ProteinTransport,Transport,Vesicle-MediatedTransport
DOCK4	yes	CellularProcess,IntracellularProteinTransport,IntracellularSignalTransduction,Localization,ProteinTransport,Transport,Vesicle-MediatedTransport
DOCK9	yes	CellularProcess,IntracellularProteinTransport,IntracellularSignalTransduction,Localization,ProteinTransport,Transport,Vesicle-MediatedTransport
DOPEY1	yes	Unclassified
DPP8	yes	MetabolicProcess,PrimaryMetabolicProcess,ProteinMetabolicProcess
DTNB	no	CellularComponentOrganization,CellularComponentOrganizationOrBiogenesis
DZIP3	no	Unclassified
EBF1	yes	Unclassified
EDEM3	no	CellularProcess,MetabolicProcess,PrimaryMetabolicProcess,ProteinMetabolicProcess
EIF2A	no	CellularProcess,MetabolicProcess
EIF5B	no	CatabolicProcess,CellularProcess,MetabolicProcess,NitrogrenCompoundMetabolicProcess,Nucleobase-ContainingCompountMetabolicProcess,Phosphate-ContainingCompoundMetabolicProcess,PrimaryMetabolicProcess,ProteinMetabolicProcess
EML5	no	Unclassified
ENAH	yes	Unclassified
ENPEP	no	CatabolicProcess,CellularProcess,MetabolicProcess,NitrogrenCompoundMetabolicProcess,PrimaryMetabolicProcess,ProteinMetabolicProcess
ENPP2	no	MetabolicProcess,Nucleobase-ContainingCompountMetabolicProcess,PrimaryMetabolicProcess
EPB41L5	no	Unclassified
EPRS	no	CellularProcess,MetabolicProcess,NitrogrenCompoundMetabolicProcess,Nucleobase-ContainingCompountMetabolicProcess,PrimaryMetabolicProcess,ProteinMetabolicProcess
EPS15	no	CellularProcess,IntracellularProteinTransport,Localization,ProteinTransport,Transport,Vesicle-MediatedTransport
EVI5	no	CatabolicProcess,CellularComponentOrganization,CellularComponentOrganizationOrBiogenesis,CellularProcess,IntracellularProteinTransport,Localization,MetabolicProcess,NitrogrenCompoundMetabolicProcess,Nucleobase-ContainingCompountMetabolicProcess,PrimaryMetabolicProcess,ProteinLocalization,ProteinTransport,Transport,Vesicle-MediatedTransport
EXOC1	no	CellularProcess,Localization,ProteinLocalization,Transport,Vesicle-MediatedTransport
EXOC2	no	CellularComponentOrganization,CellularComponentOrganizationOrBiogenesis,CellularProcess,Localization,Transport,Vesicle-MediatedTransport
EXOC6	no	IntracellularProteinTransport,Localization,ProteinTransport,Transport,Vesicle-MediatedTransport
EXOC6B	no	IntracellularProteinTransport,Localization,ProteinTransport,Transport,Vesicle-MediatedTransport
EYA3	yes	Unclassified
EZH1	no	Unclassified
FAF1	yes	ApoptoticProcess,CellularProcess,IntracellularSignalTransduction
FAM135A	no	CellularProcess,MetabolicProcess,PrimaryMetabolicProcess
FAM73A	no	Unclassified
FAM91A1	no	Unclassified
FAP	no	CellularProcess,CellularProcess,MetabolicProcess,MetabolicProcess,PrimaryMetabolicProcess,PrimaryMetabolicProcess,ProteinMetabolicProcess,ProteinMetabolicProcess
FARSB	yes	CellularProcess,MetabolicProcess,NitrogrenCompoundMetabolicProcess,Nucleobase-ContainingCompountMetabolicProcess,PrimaryMetabolicProcess,ProteinMetabolicProcess
FBXO11	yes	MetabolicProcess,PrimaryMetabolicProcess,ProteinMetabolicProcess
FCHO2	yes	Unclassified
FERMT2	yes	Unclassified
FIP1L1	no	Unclassified
FNDC3A	yes	Unclassified
FRRS1	no	Unclassified
FRYL	yes	CellularComponentOrganization,CellularComponentOrganizationOrBiogenesis,CellularProcess
FUBP1	yes	ApoptoticProcess,CellularProcess,IntracellularProteinTransport,Localization,MetabolicProcess,NuclearTransport,Nucleobase-ContainingCompountMetabolicProcess,PrimaryMetabolicProcess,ProteinMetabolicProcess,ProteinTransport,Transport
FUBP3	no	CellularProcess,IntracellularProteinTransport,Localization,MetabolicProcess,NuclearTransport,Nucleobase-ContainingCompountMetabolicProcess,PrimaryMetabolicProcess,ProteinMetabolicProcess,ProteinTransport,Transport
FXR1	yes	CellularProcess,MetabolicProcess
FYN	yes	ApoptoticProcess,CellularProcess,Localization,MetabolicProcess,Phosphate-ContainingCompoundMetabolicProcess
G3BP2	yes	Localization,Transport
GARNL3	no	Unclassified
GLS2	no	CatabolicProcess,CellularProcess,MetabolicProcess,NitrogrenCompoundMetabolicProcess,PrimaryMetabolicProcess
GMPS	yes	CellularProcess,MetabolicProcess,NitrogrenCompoundMetabolicProcess,Nucleobase-ContainingCompountMetabolicProcess,Phosphate-ContainingCompoundMetabolicProcess,PrimaryMetabolicProcess
GNL3	no	CatabolicProcess,CellularComponentOrganizationOrBiogenesis,CellularProcess,MetabolicProcess,NitrogrenCompoundMetabolicProcess,Nucleobase-ContainingCompountMetabolicProcess,Phosphate-ContainingCompoundMetabolicProcess,PrimaryMetabolicProcess
GOLGA1	no	Unclassified
GPAM	no	Unclassified
GPR64	yes	Unclassified
GRB14	no	CellularProcess
GTF2I	yes	CellularProcess,MetabolicProcess,NitrogrenCompoundMetabolicProcess
HCFC2	yes	Unclassified
HDAC2	yes	CellCyle,CellularProcess,MetabolicProcess,Nucleobase-ContainingCompountMetabolicProcess,PrimaryMetabolicProcess
HDAC3	yes	CellCyle,CellularComponentOrganization,CellularComponentOrganizationOrBiogenesis,CellularProcess,MetabolicProcess,Nucleobase-ContainingCompountMetabolicProcess,PrimaryMetabolicProcess
HEATR5B	no	Unclassified
HECTD1	yes	CellularProcess,MetabolicProcess,PrimaryMetabolicProcess,ProteinMetabolicProcess
HERC4	yes	CellularProcess,MetabolicProcess,PrimaryMetabolicProcess,ProteinMetabolicProcess
HERC5	no	CellularProcess,MetabolicProcess,PrimaryMetabolicProcess,ProteinMetabolicProcess
HIF1A	yes	CellularProcess,MetabolicProcess,NitrogrenCompoundMetabolicProcess
HIP1	yes	ApoptoticProcess,CellularComponentOrganization,CellularComponentOrganizationOrBiogenesis,CellularProcess
HIPK3	no	Unclassified
HMGCR	yes	CellularProcess,MetabolicProcess,PrimaryMetabolicProcess
HSP90B1	yes	Unclassified
HSPA4	yes	CellularComponentOrganizationOrBiogenesis
HSPA4L	no	CellularComponentOrganizationOrBiogenesis
HSPH1	yes	CellularComponentOrganizationOrBiogenesis
IARS	no	CellularProcess,MetabolicProcess,NitrogrenCompoundMetabolicProcess,Nucleobase-ContainingCompountMetabolicProcess,PrimaryMetabolicProcess,ProteinMetabolicProcess
IDE	no	MetabolicProcess,PrimaryMetabolicProcess,ProteinMetabolicProcess
IFT88	no	Unclassified
IGF2BP1	yes	ApoptoticProcess,CellularProcess,IntracellularProteinTransport,Localization,MetabolicProcess,NuclearTransport,Nucleobase-ContainingCompountMetabolicProcess,PrimaryMetabolicProcess,ProteinMetabolicProcess,ProteinTransport,Transport
IGF2BP2	yes	ApoptoticProcess,CellularProcess,IntracellularProteinTransport,Localization,MetabolicProcess,NuclearTransport,Nucleobase-ContainingCompountMetabolicProcess,PrimaryMetabolicProcess,ProteinMetabolicProcess,ProteinTransport,Transport
IL6ST	yes	Unclassified
ILF2	yes	ApoptoticProcess,CellCyle,CellularProcess,Localization,MetabolicProcess,Nucleobase-ContainingCompountMetabolicProcess,PrimaryMetabolicProcess,ProteinMetabolicProcess
ING3	yes	ApoptoticProcess,CellCyle,CellularComponentOrganization,CellularComponentOrganizationOrBiogenesis,CellularProcess,MetabolicProcess,Nucleobase-ContainingCompountMetabolicProcess,PrimaryMetabolicProcess
INPP5F	no	CellularProcess,IntracellularProteinTransport,Localization,MetabolicProcess,Phosphate-ContainingCompoundMetabolicProcess,PrimaryMetabolicProcess,ProteinTransport,Transport,Vesicle-MediatedTransport
INTS3	yes	Unclassified
INTS6	yes	Unclassified
IPO11	yes	CellularProcess,IntracellularProteinTransport,Localization,NuclearTransport,ProteinLocalization,ProteinTargeting,ProteinTransport,Transport
IPO5	yes	CellularComponentOrganization,CellularComponentOrganizationOrBiogenesis,CellularProcess,IntracellularProteinTransport,Localization,NuclearTransport,ProteinLocalization,ProteinTargeting,ProteinTransport,Transport
IPO7	yes	CellularProcess,IntracellularProteinTransport,Localization,NuclearTransport,ProteinLocalization,ProteinTargeting,ProteinTransport,Transport
IQGAP2	no	CellCyle,CellularProcess,IntracellularSignalTransduction
IREB2	yes	MetabolicProcess,PrimaryMetabolicProcess
ITGA1	no	Unclassified
ITGAV	no	Unclassified
ITGB1	yes	CellularProcess
ITSN2	no	CellularProcess,IntracellularProteinTransport,Localization,ProteinTransport,Transport,Vesicle-MediatedTransport
IVNS1ABP	yes	CellularProcess,MetabolicProcess,NitrogrenCompoundMetabolicProcess,Nucleobase-ContainingCompountMetabolicProcess,PrimaryMetabolicProcess
JAKMIP2	yes	Unclassified
JHDM1D	yes	Unclassified
JMJD1C	yes	MetabolicProcess,Nucleobase-ContainingCompountMetabolicProcess,PrimaryMetabolicProcess
KCNT2	no	CellularProcess
KCTD3	yes	Unclassified
KIAA0368	yes	MetabolicProcess,PrimaryMetabolicProcess,ProteinMetabolicProcess
KIAA1324L	no	Unclassified
KIF15	no	CatabolicProcess,CellularProcess,MetabolicProcess,NitrogrenCompoundMetabolicProcess,Nucleobase-ContainingCompountMetabolicProcess,Phosphate-ContainingCompoundMetabolicProcess,PrimaryMetabolicProcess
KIF2C	no	CatabolicProcess,CellularProcess,MetabolicProcess,NitrogrenCompoundMetabolicProcess,Nucleobase-ContainingCompountMetabolicProcess,Phosphate-ContainingCompoundMetabolicProcess,PrimaryMetabolicProcess
KIF3A	yes	CatabolicProcess,CellularProcess,MetabolicProcess,NitrogrenCompoundMetabolicProcess,Nucleobase-ContainingCompountMetabolicProcess,Phosphate-ContainingCompoundMetabolicProcess,PrimaryMetabolicProcess
KIF5B	no	CatabolicProcess,CellularComponentOrganization,CellularComponentOrganizationOrBiogenesis,CellularProcess,Localization,MetabolicProcess,NitrogrenCompoundMetabolicProcess,Nucleobase-ContainingCompountMetabolicProcess,Phosphate-ContainingCompoundMetabolicProcess,PrimaryMetabolicProcess,ProteinLocalization,Transport
KNTC1	no	Unclassified
KPNA1	yes	CellularProcess,IntracellularProteinTransport,Localization,NuclearTransport,ProteinLocalization,ProteinTargeting,ProteinTransport,Transport
KPNA4	yes	CellularProcess,IntracellularProteinTransport,Localization,NuclearTransport,ProteinLocalization,ProteinTargeting,ProteinTransport,Transport
KPNA5	no	CellularProcess,IntracellularProteinTransport,Localization,NuclearTransport,ProteinLocalization,ProteinTargeting,ProteinTransport,Transport
KPNA6	yes	CellularProcess,IntracellularProteinTransport,Localization,NuclearTransport,ProteinLocalization,ProteinTargeting,ProteinTransport,Transport
KTN1	no	Unclassified
L3MBTL3	yes	CellCyle,CellularProcess,MetabolicProcess,Nucleobase-ContainingCompountMetabolicProcess,PrimaryMetabolicProcess
LARP4	yes	MetabolicProcess,Nucleobase-ContainingCompountMetabolicProcess,PrimaryMetabolicProcess
LGR4	yes	Unclassified
LIN9	yes	CellularComponentOrganization,CellularComponentOrganizationOrBiogenesis,CellularProcess,MetabolicProcess,Nucleobase-ContainingCompountMetabolicProcess,PrimaryMetabolicProcess
LPHN2	yes	Unclassified
LRP1B	yes	Unclassified
LRRC7	yes	Unclassified
MAN1A2	yes	CellularProcess,MetabolicProcess,PrimaryMetabolicProcess,ProteinMetabolicProcess
MAP3K2	yes	ApoptoticProcess,CellularProcess,IntracellularSignalTransduction
MAP3K5	yes	CellularProcess,IntracellularSignalTransduction
MAP3K7	yes	Unclassified
MAP4K2	no	ApoptoticProcess,CellularProcess,IntracellularSignalTransduction
MAP4K3	no	ApoptoticProcess,CellularProcess,IntracellularSignalTransduction
MAP4K5	yes	ApoptoticProcess,CellularProcess,IntracellularSignalTransduction
MARK1	yes	CellularProcess,IntracellularSignalTransduction
MARK3	no	CellularProcess,IntracellularSignalTransduction
MBTD1	yes	CellCyle,CellularProcess,MetabolicProcess,Nucleobase-ContainingCompountMetabolicProcess,PrimaryMetabolicProcess
MCF2	yes	CellularProcess,IntracellularSignalTransduction
MCTP1	no	Unclassified
MED1	yes	CellularProcess,MetabolicProcess,NitrogrenCompoundMetabolicProcess,Nucleobase-ContainingCompountMetabolicProcess,PrimaryMetabolicProcess
MED14	yes	CellularProcess,MetabolicProcess,NitrogrenCompoundMetabolicProcess
MFN1	no	CellularProcess,IntracellularProteinTransport,Localization,ProteinTransport,Transport
MGAT4A	no	Unclassified
MKLN1	yes	Unclassified
MMS19	no	MetabolicProcess,Nucleobase-ContainingCompountMetabolicProcess,PrimaryMetabolicProcess
MON2	yes	Unclassified
MPP3	no	Localization,ProteinLocalization
MPP4	no	Localization,ProteinLocalization
MPP5	no	Localization,ProteinLocalization
MSH3	no	CatabolicProcess,CellularComponentOrganization,CellularComponentOrganizationOrBiogenesis,CellularProcess,MetabolicProcess,NitrogrenCompoundMetabolicProcess,Nucleobase-ContainingCompountMetabolicProcess,Phosphate-ContainingCompoundMetabolicProcess,PrimaryMetabolicProcess
MTF2	yes	Unclassified
MTMR1	yes	IntracellularProteinTransport,Localization,MetabolicProcess,Phosphate-ContainingCompoundMetabolicProcess,ProteinTransport,Transport,Vesicle-MediatedTransport
MTMR6	no	IntracellularProteinTransport,Localization,MetabolicProcess,Phosphate-ContainingCompoundMetabolicProcess,ProteinTransport,Transport,Vesicle-MediatedTransport
MYB	no	CellCyle,CellularProcess,MetabolicProcess,NitrogrenCompoundMetabolicProcess
MYCBP2	yes	CellCyle,CellularProcess,Localization,MetabolicProcess,Nucleobase-ContainingCompountMetabolicProcess,PrimaryMetabolicProcess,Transport
MYO1B	no	CellCyle,CellularComponentOrganization,CellularComponentOrganizationOrBiogenesis,CellularProcess,IntracellularProteinTransport,IntracellularSignalTransduction,Localization,Mitosis,ProteinTransport,Transport,Vesicle-MediatedTransport
MYO9A	yes	CellCyle,CellularComponentOrganization,CellularComponentOrganizationOrBiogenesis,CellularProcess,IntracellularProteinTransport,IntracellularSignalTransduction,Localization,Mitosis,ProteinTransport,Transport,Vesicle-MediatedTransport
NAE1	no	CellularProcess,MetabolicProcess,PrimaryMetabolicProcess,ProteinMetabolicProcess
NARG2	no	Unclassified
NAT10	no	Unclassified
NAV3	yes	Unclassified
NBEA	yes	Unclassified
NBEAL1	no	CatabolicProcess,CellularProcess,MetabolicProcess
NCKAP1	yes	Unclassified
NCKAP1L	yes	Unclassified
NCOA1	yes	CellularProcess,MetabolicProcess,NitrogrenCompoundMetabolicProcess,Nucleobase-ContainingCompountMetabolicProcess,PrimaryMetabolicProcess
NEDD1	no	CellularProcess,Localization,ProteinLocalization
NFXL1	no	CellularProcess,MetabolicProcess,NitrogrenCompoundMetabolicProcess
NOC3L	no	Unclassified
NPAT	no	Unclassified
NRCAM	no	Unclassified
NRD1	no	CatabolicProcess,CellularProcess,MetabolicProcess,NitrogrenCompoundMetabolicProcess,PrimaryMetabolicProcess,ProteinMetabolicProcess
NSMAF	no	Unclassified
NUP133	no	CellularComponentOrganization,CellularComponentOrganizationOrBiogenesis,CellularProcess,IntracellularProteinTransport,Localization,MetabolicProcess,NitrogrenCompoundMetabolicProcess,NuclearTransport,Nucleobase-ContainingCompountMetabolicProcess,PrimaryMetabolicProcess,ProteinLocalization,ProteinTargeting,ProteinTransport,Transport
NUP153	yes	CellularProcess,IntracellularProteinTransport,Localization,NuclearTransport,ProteinLocalization,ProteinTargeting,ProteinTransport,Transport
NUP160	no	CellularProcess,Localization,NuclearTransport,Transport
NUP54	yes	CellularComponentOrganization,CellularComponentOrganizationOrBiogenesis,CellularProcess,IntracellularProteinTransport,Localization,NuclearTransport,ProteinLocalization,ProteinTargeting,ProteinTransport,Transport
NUPL1	no	CellularProcess,IntracellularProteinTransport,Localization,NuclearTransport,ProteinLocalization,ProteinTargeting,ProteinTransport,Transport
NXF1	yes	CellularProcess,Localization,NuclearTransport,Transport
OSBPL8	yes	Unclassified
OSBPL9	yes	Unclassified
OXSR1	yes	ApoptoticProcess,CellularProcess,IntracellularSignalTransduction
PABPC4	yes	Unclassified
PAK1	no	ApoptoticProcess,CellularComponentOrganization,CellularComponentOrganizationOrBiogenesis,CellularProcess,CellularProcess,IntracellularSignalTransduction,IntracellularSignalTransduction,Localization,MetabolicProcess,Phosphate-ContainingCompoundMetabolicProcess
PAM	no	Unclassified
PAN3	yes	Unclassified
PAPOLA	yes	CellularProcess,MetabolicProcess,NitrogrenCompoundMetabolicProcess,Nucleobase-ContainingCompountMetabolicProcess,PrimaryMetabolicProcess
PAPOLG	yes	CellularProcess,MetabolicProcess,NitrogrenCompoundMetabolicProcess,Nucleobase-ContainingCompountMetabolicProcess,PrimaryMetabolicProcess
PARP6	yes	Unclassified
PARP8	no	Unclassified
PATL1	yes	CatabolicProcess,CellularComponentOrganization,CellularComponentOrganizationOrBiogenesis,CellularProcess,MetabolicProcess,NitrogrenCompoundMetabolicProcess,Nucleobase-ContainingCompountMetabolicProcess,PrimaryMetabolicProcess
PCBP2	yes	ApoptoticProcess,CellularProcess,IntracellularProteinTransport,Localization,MetabolicProcess,NuclearTransport,Nucleobase-ContainingCompountMetabolicProcess,PrimaryMetabolicProcess,ProteinMetabolicProcess,ProteinTransport,Transport
PCF11	yes	CellularProcess,MetabolicProcess,NitrogrenCompoundMetabolicProcess,Nucleobase-ContainingCompountMetabolicProcess,PrimaryMetabolicProcess
PDCD4	no	ApoptoticProcess
PDCD6IP	no	Unclassified
PDE2A	yes	CellularProcess
PDS5A	yes	CellCyle,CellularProcess,Mitosis
PDS5B	yes	CellCyle,CellularProcess,Mitosis
PDXDC1	no	MetabolicProcess,PrimaryMetabolicProcess
PGM2L1	no	MetabolicProcess,Phosphate-ContainingCompoundMetabolicProcess
PHIP	yes	CellularComponentOrganization,CellularComponentOrganizationOrBiogenesis,CellularProcess,MetabolicProcess,NitrogrenCompoundMetabolicProcess,Nucleobase-ContainingCompountMetabolicProcess,PrimaryMetabolicProcess
PHTF1	no	MetabolicProcess,Nucleobase-ContainingCompountMetabolicProcess,PrimaryMetabolicProcess
PHTF2	no	MetabolicProcess,Nucleobase-ContainingCompountMetabolicProcess,PrimaryMetabolicProcess
PIAS1	yes	MetabolicProcess,PrimaryMetabolicProcess,ProteinMetabolicProcess
PICALM	yes	IntracellularProteinTransport,Localization,ProteinTransport,Transport,Vesicle-MediatedTransport
PIK3C2A	no	CellularComponentOrganization,CellularComponentOrganizationOrBiogenesis,CellularProcess,IntracellularSignalTransduction,Localization,MetabolicProcess,Phosphate-ContainingCompoundMetabolicProcess,Transport,Vesicle-MediatedTransport
PIK3C2G	no	CellularProcess,IntracellularSignalTransduction,Localization,MetabolicProcess,Phosphate-ContainingCompoundMetabolicProcess
PIK3CB	yes	CellularProcess,IntracellularSignalTransduction,Localization,MetabolicProcess,Phosphate-ContainingCompoundMetabolicProcess,PrimaryMetabolicProcess,ProteinMetabolicProcess
PKHD1L1	no	Unclassified
PKN2	yes	CellularProcess,IntracellularSignalTransduction,MetabolicProcess,Phosphate-ContainingCompoundMetabolicProcess
PLD1	no	CellularProcess,Localization
PLEKHA5	yes	Unclassified
PLS1	no	CellularComponentOrganization,CellularComponentOrganization,CellularComponentOrganizationOrBiogenesis,CellularComponentOrganizationOrBiogenesis,CellularProcess,CellularProcess,Localization,Transport
PLXNC1	yes	CatabolicProcess,CellularComponentOrganization,CellularComponentOrganizationOrBiogenesis,CellularProcess,MetabolicProcess,NitrogrenCompoundMetabolicProcess,Nucleobase-ContainingCompountMetabolicProcess,PrimaryMetabolicProcess
POLA1	yes	Unclassified
POLA2	no	CellularProcess,MetabolicProcess,NitrogrenCompoundMetabolicProcess,Nucleobase-ContainingCompountMetabolicProcess,PrimaryMetabolicProcess
POLK	no	Unclassified
POLR2B	yes	CellularProcess,MetabolicProcess,NitrogrenCompoundMetabolicProcess,Nucleobase-ContainingCompountMetabolicProcess,PrimaryMetabolicProcess
POSTN	no	CellularComponentOrganization,CellularComponentOrganizationOrBiogenesis,CellularProcess
PPFIBP1	no	Unclassified
PPP1R12B	no	MetabolicProcess,PrimaryMetabolicProcess,ProteinMetabolicProcess
PPP2R1B	no	Unclassified
PPP3CB	yes	ApoptoticProcess,CellCyle,CellularProcess,IntracellularSignalTransduction,MetabolicProcess,Mitosis,Nucleobase-ContainingCompountMetabolicProcess,PrimaryMetabolicProcess,ProteinMetabolicProcess
PRKACB	no	CellCyle,CellularProcess,Mitosis
PRKCI	no	CellularProcess,IntracellularSignalTransduction,MetabolicProcess,Phosphate-ContainingCompoundMetabolicProcess
PRKDC	yes	CellularProcess,MetabolicProcess,NitrogrenCompoundMetabolicProcess,Nucleobase-ContainingCompountMetabolicProcess,Phosphate-ContainingCompoundMetabolicProcess,PrimaryMetabolicProcess
PRMT5	yes	CellularComponentOrganization,CellularComponentOrganizationOrBiogenesis,CellularProcess,MetabolicProcess,NitrogrenCompoundMetabolicProcess,Nucleobase-ContainingCompountMetabolicProcess,PrimaryMetabolicProcess,ProteinMetabolicProcess
PRPF19	yes	CellularComponentOrganization,CellularComponentOrganizationOrBiogenesis,CellularProcess,MetabolicProcess,NitrogrenCompoundMetabolicProcess,Nucleobase-ContainingCompountMetabolicProcess,PrimaryMetabolicProcess,ProteinMetabolicProcess
PRPF40A	yes	CellularProcess,MetabolicProcess,NitrogrenCompoundMetabolicProcess,Nucleobase-ContainingCompountMetabolicProcess,PrimaryMetabolicProcess
PRTG	no	Unclassified
PSMC2	yes	CatabolicProcess,CellularComponentOrganization,CellularComponentOrganizationOrBiogenesis,CellularProcess,MetabolicProcess,NitrogrenCompoundMetabolicProcess,Nucleobase-ContainingCompountMetabolicProcess,PrimaryMetabolicProcess,ProteinMetabolicProcess
PSMC6	yes	Unclassified
PSMD1	yes	CatabolicProcess,CellularProcess,MetabolicProcess,PrimaryMetabolicProcess,ProteinMetabolicProcess
PSME4	yes	Unclassified
PTBP2	yes	Unclassified
PTK2	yes	CellularComponentOrganization,CellularComponentOrganizationOrBiogenesis,CellularProcess,MetabolicProcess,Phosphate-ContainingCompoundMetabolicProcess
PTK2B	yes	CellularComponentOrganization,CellularComponentOrganizationOrBiogenesis,CellularProcess,MetabolicProcess,Phosphate-ContainingCompoundMetabolicProcess
PTPN12	yes	MetabolicProcess,PrimaryMetabolicProcess,ProteinMetabolicProcess
PTPN13	no	MetabolicProcess,PrimaryMetabolicProcess,ProteinMetabolicProcess
PTPN22	no	MetabolicProcess,PrimaryMetabolicProcess,ProteinMetabolicProcess
PTPN3	no	MetabolicProcess,PrimaryMetabolicProcess,ProteinMetabolicProcess
PTPN4	yes	MetabolicProcess,PrimaryMetabolicProcess,ProteinMetabolicProcess
PTPRK	yes	MetabolicProcess,PrimaryMetabolicProcess,ProteinMetabolicProcess
PTPRQ	no	MetabolicProcess,PrimaryMetabolicProcess,ProteinMetabolicProcess
PTPRZ1	yes	MetabolicProcess,PrimaryMetabolicProcess,ProteinMetabolicProcess
R3HDM1	no	Unclassified
R3HDM2	yes	Unclassified
RABGAP1	yes	CatabolicProcess,CellularComponentOrganization,CellularComponentOrganizationOrBiogenesis,CellularProcess,IntracellularProteinTransport,Localization,MetabolicProcess,NitrogrenCompoundMetabolicProcess,Nucleobase-ContainingCompountMetabolicProcess,PrimaryMetabolicProcess,ProteinLocalization,ProteinTransport,Transport,Vesicle-MediatedTransport
RABGAP1L	no	CatabolicProcess,CellularComponentOrganization,CellularComponentOrganizationOrBiogenesis,CellularProcess,IntracellularProteinTransport,Localization,MetabolicProcess,NitrogrenCompoundMetabolicProcess,Nucleobase-ContainingCompountMetabolicProcess,PrimaryMetabolicProcess,ProteinLocalization,ProteinTransport,Transport,Vesicle-MediatedTransport
RAD17	no	CellCyle,CellularProcess,MetabolicProcess,Nucleobase-ContainingCompountMetabolicProcess,PrimaryMetabolicProcess
RALGPS2	yes	CellCyle,CellularProcess,Mitosis
RAP1GDS1	no	CatabolicProcess,CellularProcess,IntracellularSignalTransduction,MetabolicProcess,NitrogrenCompoundMetabolicProcess,Nucleobase-ContainingCompountMetabolicProcess,PrimaryMetabolicProcess
RAPGEF4	yes	CellCyle,CellularProcess,IntracellularSignalTransduction,Mitosis
RAPGEF6	yes	CellCyle,CellularProcess,IntracellularSignalTransduction,Mitosis
RB1CC1	yes	CatabolicProcess,CellularComponentOrganization,CellularComponentOrganizationOrBiogenesis,CellularProcess,MetabolicProcess,PrimaryMetabolicProcess,ProteinMetabolicProcess
RBL2	yes	CellCyle,CellularProcess,MetabolicProcess,Nucleobase-ContainingCompountMetabolicProcess,PrimaryMetabolicProcess
RBM25	yes	Unclassified
RBM26	yes	Unclassified
REL	yes	Unclassified
REPS1	yes	CellularProcess,IntracellularProteinTransport,Localization,ProteinTransport,Transport,Vesicle-MediatedTransport
RFC1	no	CellularProcess,Localization,MetabolicProcess,NitrogrenCompoundMetabolicProcess,PrimaryMetabolicProcess,Transport
RFWD2	yes	Unclassified
RFX4	yes	CellularComponentOrganization,CellularComponentOrganizationOrBiogenesis,CellularProcess,MetabolicProcess,NitrogrenCompoundMetabolicProcess,Nucleobase-ContainingCompountMetabolicProcess,PrimaryMetabolicProcess
RGS22	no	CatabolicProcess,CellularProcess,MetabolicProcess,NitrogrenCompoundMetabolicProcess,Nucleobase-ContainingCompountMetabolicProcess,PrimaryMetabolicProcess
RIF1	yes	CellularProcess
RNF17	yes	Unclassified
RNGTT	no	MetabolicProcess,Nucleobase-ContainingCompountMetabolicProcess,PrimaryMetabolicProcess
ROS1	no	Unclassified
RPA1	no	CellularProcess,MetabolicProcess,NitrogrenCompoundMetabolicProcess,Nucleobase-ContainingCompountMetabolicProcess,PrimaryMetabolicProcess
RPAP3	no	MetabolicProcess,PrimaryMetabolicProcess,ProteinMetabolicProcess
RPS6KA5	yes	CellularProcess,IntracellularSignalTransduction,MetabolicProcess,Phosphate-ContainingCompoundMetabolicProcess
RRM1	yes	Unclassified
RTF1	yes	Unclassified
RXFP1	no	Unclassified
RYK	no	Unclassified
SBNO1	yes	MetabolicProcess,Nucleobase-ContainingCompountMetabolicProcess,PrimaryMetabolicProcess
SCAPER	no	Unclassified
SCFD1	yes	CellularProcess,IntracellularProteinTransport,Localization,ProteinTransport,Transport,Vesicle-MediatedTransport
SCYL2	yes	Unclassified
SEC24A	no	IntracellularProteinTransport,Localization,ProteinTransport,Transport,Vesicle-MediatedTransport
SEL1L	no	Unclassified
SEMA6A	yes	CellularProcess,Localization
SEMA6D	yes	Unclassified
SENP2	yes	CellularProcess,MetabolicProcess,PrimaryMetabolicProcess,ProteinMetabolicProcess
SENP6	yes	Unclassified
SKIV2L2	no	Unclassified
SLC15A2	no	Unclassified
SLC26A7	no	CellularProcess,Localization,Transport
SLC30A6	no	CellularProcess
SLC38A1	yes	CellularProcess,Localization,Transport
SLC44A1	yes	Unclassified
SLC4A10	no	CellularProcess,Localization,Transport
SLC6A14	yes	Unclassified
SMARCA5	yes	Unclassified
SMARCAD1	yes	Unclassified
SMARCC1	yes	MetabolicProcess,Nucleobase-ContainingCompountMetabolicProcess,PrimaryMetabolicProcess
SMC2	yes	Unclassified
SMC4	no	Unclassified
SMC5	yes	MetabolicProcess,Nucleobase-ContainingCompountMetabolicProcess,PrimaryMetabolicProcess
SMEK2	no	Unclassified
SNAP91	yes	IntracellularProteinTransport,Localization,ProteinTransport,Transport,Vesicle-MediatedTransport
SNX1	yes	CellularComponentOrganization,CellularComponentOrganizationOrBiogenesis,CellularProcess,Localization,Transport,Vesicle-MediatedTransport
SNX13	yes	CellularProcess,IntracellularProteinTransport,Localization,ProteinTransport,Transport
SP100	no	Unclassified
SPAG17	no	Unclassified
SPAG9	yes	CellularProcess,IntracellularSignalTransduction,Localization,Transport,Vesicle-MediatedTransport
STAG1	yes	CellCyle,CellularProcess,Mitosis
STAG2	yes	CellCyle,CellularProcess,Mitosis
STAT4	yes	CellularProcess,IntracellularSignalTransduction,MetabolicProcess,Nucleobase-ContainingCompountMetabolicProcess,PrimaryMetabolicProcess
STRBP	yes	ApoptoticProcess,CellCyle,CellularProcess,Localization,MetabolicProcess,Nucleobase-ContainingCompountMetabolicProcess,PrimaryMetabolicProcess,ProteinMetabolicProcess
STRN3	no	Unclassified
STT3B	yes	CellularProcess,MetabolicProcess,PrimaryMetabolicProcess,ProteinMetabolicProcess
STXBP3	no	CellularProcess,IntracellularProteinTransport,Localization,ProteinTransport,Transport
STXBP5	yes	CatabolicProcess,CellularProcess,Localization,MetabolicProcess,NitrogrenCompoundMetabolicProcess,Nucleobase-ContainingCompountMetabolicProcess,PrimaryMetabolicProcess,ProteinLocalization,ProteinTransport,Transport,Vesicle-MediatedTransport
SVEP1	no	CellularProcess
TAOK1	yes	ApoptoticProcess,CellularProcess,IntracellularSignalTransduction
TARS	no	CellularProcess,MetabolicProcess,NitrogrenCompoundMetabolicProcess,Nucleobase-ContainingCompountMetabolicProcess,PrimaryMetabolicProcess,ProteinMetabolicProcess
TAX1BP1	no	Unclassified
TBC1D15	no	CatabolicProcess,CellularComponentOrganization,CellularComponentOrganizationOrBiogenesis,CellularProcess,IntracellularProteinTransport,Localization,MetabolicProcess,NitrogrenCompoundMetabolicProcess,Nucleobase-ContainingCompountMetabolicProcess,PrimaryMetabolicProcess,ProteinLocalization,ProteinTransport,Transport,Vesicle-MediatedTransport
TBC1D23	no	Unclassified
TBC1D8B	no	CatabolicProcess,CellularComponentOrganization,CellularComponentOrganizationOrBiogenesis,CellularProcess,IntracellularProteinTransport,Localization,MetabolicProcess,NitrogrenCompoundMetabolicProcess,Nucleobase-ContainingCompountMetabolicProcess,PrimaryMetabolicProcess,ProteinLocalization,ProteinTransport,Transport,Vesicle-MediatedTransport
TCERG1	yes	MetabolicProcess,Nucleobase-ContainingCompountMetabolicProcess,PrimaryMetabolicProcess
TDRD9	no	CatabolicProcess,CellularProcess,MetabolicProcess,NitrogrenCompoundMetabolicProcess,Nucleobase-ContainingCompountMetabolicProcess,Phosphate-ContainingCompoundMetabolicProcess,PrimaryMetabolicProcess
TEX10	yes	CellularComponentOrganizationOrBiogenesis,CellularProcess,MetabolicProcess,NitrogrenCompoundMetabolicProcess,Nucleobase-ContainingCompountMetabolicProcess,PrimaryMetabolicProcess
TJP1	yes	CellularProcess
TLK1	yes	CellCyle,CellularProcess,IntracellularSignalTransduction,MetabolicProcess,Mitosis,Nucleobase-ContainingCompountMetabolicProcess,PrimaryMetabolicProcess
TM9SF2	yes	Unclassified
TM9SF3	yes	Unclassified
TMEM131	yes	Unclassified
TNIK	yes	ApoptoticProcess,CellularComponentOrganization,CellularComponentOrganizationOrBiogenesis,CellularProcess,IntracellularSignalTransduction
TNKS2	no	Unclassified
TNPO1	yes	CellularComponentOrganization,CellularComponentOrganizationOrBiogenesis,CellularProcess,IntracellularProteinTransport,Localization,NuclearTransport,ProteinLocalization,ProteinTargeting,ProteinTransport,Transport
TOP2B	yes	CellCyle,CellularComponentOrganization,CellularComponentOrganizationOrBiogenesis,CellularProcess,MetabolicProcess,NitrogrenCompoundMetabolicProcess,Nucleobase-ContainingCompountMetabolicProcess,PrimaryMetabolicProcess
TPP2	yes	MetabolicProcess,PrimaryMetabolicProcess,ProteinMetabolicProcess
TPR	yes	CellCyle,CellularComponentOrganization,CellularComponentOrganizationOrBiogenesis,CellularProcess,Localization,Mitosis,NuclearTransport,Transport
TRHDE	no	CatabolicProcess,CellularProcess,MetabolicProcess,NitrogrenCompoundMetabolicProcess,PrimaryMetabolicProcess,ProteinMetabolicProcess
TRIM24	yes	MetabolicProcess,Nucleobase-ContainingCompountMetabolicProcess,PrimaryMetabolicProcess
TRIM33	yes	Unclassified
TRIP12	yes	CellularProcess,MetabolicProcess,PrimaryMetabolicProcess,ProteinMetabolicProcess
TRPM7	no	Unclassified
TTC17	yes	Unclassified
TTLL7	no	MetabolicProcess,PrimaryMetabolicProcess,ProteinMetabolicProcess
TXNRD1	no	MetabolicProcess,NitrogrenCompoundMetabolicProcess,PrimaryMetabolicProcess,ProteinMetabolicProcess
UBA6	yes	CatabolicProcess,CellularProcess,MetabolicProcess,PrimaryMetabolicProcess,ProteinMetabolicProcess
UBR2	yes	CatabolicProcess,CellularComponentOrganization,CellularComponentOrganizationOrBiogenesis,CellularProcess,MetabolicProcess,NitrogrenCompoundMetabolicProcess,Nucleobase-ContainingCompountMetabolicProcess,PrimaryMetabolicProcess,ProteinMetabolicProcess
UBR3	yes	CatabolicProcess,CellularProcess,MetabolicProcess,PrimaryMetabolicProcess,ProteinMetabolicProcess
UBR5	yes	CatabolicProcess,CellularProcess,MetabolicProcess,PrimaryMetabolicProcess,ProteinMetabolicProcess
UHRF1BP1L	yes	Unclassified
ULK2	no	CellularComponentOrganization,CellularComponentOrganizationOrBiogenesis
USO1	yes	CellularComponentOrganization,CellularComponentOrganizationOrBiogenesis,CellularProcess,IntracellularProteinTransport,Localization,ProteinLocalization,ProteinTransport,Transport,Vesicle-MediatedTransport
USP15	yes	Unclassified
USP24	yes	Unclassified
USP33	yes	Unclassified
USP37	yes	CellCyle,CellularProcess
USP9Y	no	Unclassified
UTP20	no	CellularComponentOrganizationOrBiogenesis,CellularProcess,MetabolicProcess,NitrogrenCompoundMetabolicProcess,Nucleobase-ContainingCompountMetabolicProcess,PrimaryMetabolicProcess
UTRN	no	Unclassified
UTY	no	MetabolicProcess,Nucleobase-ContainingCompountMetabolicProcess,PrimaryMetabolicProcess
UVRAG	no	Unclassified
VAV2	no	CellularProcess,IntracellularSignalTransduction
VPS39	no	Localization,Transport,Vesicle-MediatedTransport
VPS41	no	CellularComponentOrganization,CellularComponentOrganizationOrBiogenesis,CellularProcess,IntracellularProteinTransport,Localization,ProteinLocalization,ProteinTargeting,ProteinTransport,Transport,Vesicle-MediatedTransport
VPS54	yes	CellularProcess,Localization,Transport,Vesicle-MediatedTransport
VPS8	no	Unclassified
VWA3A	no	MetabolicProcess,PrimaryMetabolicProcess,ProteinMetabolicProcess
WDFY3	yes	Unclassified
WDHD1	no	MetabolicProcess,Nucleobase-ContainingCompountMetabolicProcess,PrimaryMetabolicProcess
WDR26	yes	Unclassified
WDR3	no	CellularComponentOrganizationOrBiogenesis,CellularProcess,MetabolicProcess,NitrogrenCompoundMetabolicProcess,Nucleobase-ContainingCompountMetabolicProcess,PrimaryMetabolicProcess
WDR43	yes	Unclassified
WDR44	yes	Unclassified
WDR48	yes	Unclassified
WWP1	yes	CatabolicProcess,CellularProcess,MetabolicProcess,PrimaryMetabolicProcess,ProteinMetabolicProcess
XPNPEP1	yes	MetabolicProcess,PrimaryMetabolicProcess,ProteinMetabolicProcess
XPO1	yes	CellularComponentOrganizationOrBiogenesis,CellularProcess,IntracellularProteinTransport,Localization,NuclearTransport,ProteinLocalization,ProteinTransport,Transport
XPO7	yes	CellularProcess,IntracellularProteinTransport,Localization,NuclearTransport,ProteinLocalization,ProteinTransport,Transport
XPOT	yes	CellularProcess,Localization,NuclearTransport,Transport
XRCC5	yes	CellularComponentOrganization,CellularComponentOrganizationOrBiogenesis,CellularProcess,MetabolicProcess,NitrogrenCompoundMetabolicProcess,Nucleobase-ContainingCompountMetabolicProcess,PrimaryMetabolicProcess
XRN1	yes	MetabolicProcess,Nucleobase-ContainingCompountMetabolicProcess,PrimaryMetabolicProcess
YTHDC2	yes	CatabolicProcess,CellularProcess,MetabolicProcess,NitrogrenCompoundMetabolicProcess,Nucleobase-ContainingCompountMetabolicProcess,Phosphate-ContainingCompoundMetabolicProcess,PrimaryMetabolicProcess
ZC3H7A	yes	Unclassified
ZCCHC11	yes	CellCyle,CellularProcess,Mitosis
ZCCHC6	yes	CellCyle,CellularProcess,Mitosis
ZDHHC17	yes	Unclassified
ZFYVE16	no	Unclassified
ZMYM4	yes	CellularComponentOrganization,CellularComponentOrganizationOrBiogenesis,CellularProcess,MetabolicProcess,NitrogrenCompoundMetabolicProcess
ZNF280C	yes	Unclassified
ZNF292	yes	MetabolicProcess,Nucleobase-ContainingCompountMetabolicProcess,PrimaryMetabolicProcess
ZNF451	no	Unclassified
ZZZ3	yes	MetabolicProcess,Nucleobase-ContainingCompountMetabolicProcess,PrimaryMetabolicProcess
