# Supplementary material for: Hereditary cancer genes are highly susceptible to splicing mutations
Source: PLoS Genet. 2018 Mar 5;14(3):e1007231. doi: 10.1371/journal.pgen.1007231 (PMC5854443; doi:10.1371/journal.pgen.1007231)
Supplement: S9 Table — (XLSX) [file pgen.1007231.s016.xlsx]

## Sheet: Sheet1
Gene	ESM browser link
APC	http://fairbrother.biomed.brown.edu/ESM_browser/php/idRedirector?pid=APC
ATM	http://fairbrother.biomed.brown.edu/ESM_browser/php/idRedirector?pid=ATM
BRCA1	http://fairbrother.biomed.brown.edu/ESM_browser/php/idRedirector?pid=BRCA1
BRCA2	http://fairbrother.biomed.brown.edu/ESM_browser/php/idRedirector?pid=BRCA2
COL1A1	http://fairbrother.biomed.brown.edu/ESM_browser/php/idRedirector?pid=COL1A1
COL2A1	http://fairbrother.biomed.brown.edu/ESM_browser/php/idRedirector?pid=COL2A1
EXT1	http://fairbrother.biomed.brown.edu/ESM_browser/php/idRedirector?pid=EXT1
FANCA	http://fairbrother.biomed.brown.edu/ESM_browser/php/idRedirector?pid=FANCA
FANCD2	http://fairbrother.biomed.brown.edu/ESM_browser/php/idRedirector?pid=FANCD2
MLH1	http://fairbrother.biomed.brown.edu/ESM_browser/php/idRedirector?pid=MLH1
NF1	http://fairbrother.biomed.brown.edu/ESM_browser/php/idRedirector?pid=NF1
NF2	http://fairbrother.biomed.brown.edu/ESM_browser/php/idRedirector?pid=NF2
PMS2	http://fairbrother.biomed.brown.edu/ESM_browser/php/idRedirector?pid=PMS2
PRKAR1A	http://fairbrother.biomed.brown.edu/ESM_browser/php/idRedirector?pid=PRKAR1A
RB1	http://fairbrother.biomed.brown.edu/ESM_browser/php/idRedirector?pid=RB1
TSC2	http://fairbrother.biomed.brown.edu/ESM_browser/php/idRedirector?pid=TSC2
WAS	http://fairbrother.biomed.brown.edu/ESM_browser/php/idRedirector?pid=WAS
